# Supplementary material for: Filamentous Pseudomonas Phage Pf4 in the Context of Therapy-Inducibility, Infectivity, Lysogenic Conversion, and Potential Application
Source: MDPI journal article supplement (doi:10.3390/v14061261), 2022-06-10
Supplement: s1 [file s1]

Table S1. Primers used in the study.

| Purpose   | Label of Primer | Gene function                     | Sequence (5' -> 3')            | Expected product (bp) | Reference                   |
|-----------|-----------------|-----------------------------------|--------------------------------|-----------------------|-----------------------------|
| RT-qPCR   | RpoD-F          | Sigma factor 70                   | CGT TGA TCC CCA<br>TGT CGT T   | 155                   | This study.                 |
|           | RpoD -R         |                                   | GCA ACA GCA ATC<br>TCG TCT GA  |                       |                             |
|           | ProC-F          | Pyrroline-5-carboxylate reductase | CAG GCC GGG CAG<br>TTG CTG TC  | 180                   | Salvi et al., 2003; [79]    |
|           | ProC -R         |                                   | GGT CAG GCG CGA<br>GGC TGT CT  |                       |                             |
|           | Pf4CoaB-F       | Major capsid protein (CoaB)       | GCA ACG CAT CGC<br>CAA GTT     | 113                   | This study.                 |
|           | Pf4CoaB -R      |                                   | CGC TGG TGT CGA<br>TCA CCC     |                       |                             |
|           | Pf4Zot-F        | Zonula occludens toxin (Zot)      | GAT GTT CGG CGT<br>GGT GAG     | 180                   | This study.                 |
|           | Pf4Zot-R        |                                   | ATC TTC GAC GAA<br>ACC CAA CTG |                       |                             |
|           | Pf4CoaA-F       | Minor capsid protein (CoaA)       | GTG CCG ATT CCT<br>ACA CCT TC  | 135                   | This study.                 |
|           | Pf4CoaA-R       |                                   | CCT TGA CGC AGG<br>TAG TTC CC  |                       |                             |
|           | PfLES58Co aA-F  | Minor capsid protein (CoaA)       | ATC GAA CTT GGA<br>AGC GAG GA  | 110                   | This study.                 |
|           | PfLES58Co aA-R  |                                   | GCT CCT TCG ACA<br>AGA CCA TC  |                       |                             |
|           | Pf5CoaA-F       | Minor capsid protein (CoaA)       | CGT GTT GAT GAC<br>GGA CGG TA  | 134                   | This study.                 |
|           | Pf5CoaA-R       |                                   | GAG GAC AGC CAG<br>GGT CAT TC  |                       |                             |
|           | Pf4RF-F         | Replicative form (RF)             | CTT GGC AGG GTG<br>ATT TGG A   | 95                    | This study.                 |
|           | Pf4RF-R         |                                   | AGG AAC GCT TCA<br>AAA CCC TA  |                       |                             |
|           | PfLES58RF -F    | Replicative form (RF)             | ACG GCT CTG CAC<br>TTC TAC G   | 120                   | This study.                 |
|           | PfLES58RF -R    |                                   | CGA CAG TTC TTC<br>GAC ACT TGC |                       |                             |
|           | Pf5RF-F         | Replicative form (RF)             | GCC TAG CGT TGA<br>CCA GTT A   | 78                    | This study.                 |
|           | Pf5RF-R         |                                   | CTT TGC CGA TTT<br>GTG CGT A   |                       |                             |
| PCR/RF LP | IntF4-F         | Integrase (Int)                   | TCG AAT TCC GCT<br>TCC ATC AC  | 1001                  | Knezevic et al., 2015; [14] |
|           | IntF4-R         |                                   | CCT GAT GCT TGG<br>TCA GGT ACG |                       |                             |
|           | Pf4RFc-F        | Replicative form (RF)             | AGC AGC GCG ATG<br>AAG CAA T   | 865                   |                             |

|                  |                                          |                                |     |                            |
|------------------|------------------------------------------|--------------------------------|-----|----------------------------|
| Pf4RFc -R        |                                          | TAG AGG CCA TTT<br>GTG ACT GGA |     | Rice et al.,<br>2009; [13] |
| Pf4/LESB5<br>8-F | Pf4 integration site in<br>LESB58 genome | CAA TGG TCG TCA<br>CGC AGA AC  | 943 | This study.                |
| Pf4/LESB5<br>8-R |                                          | CCG CTC AAC CCG<br>ATC TAC     |     |                            |
| Pf4/PA14-F       | Pf4 integration site in<br>PA14 genome   | CAA TGG TCG TCA<br>CGC AGA AC  | 943 | This study.                |
| Pf4/PA14-R       |                                          | CCG CTC AAC CCG<br>ATC TAC     |     |                            |

Table S2. Sequences of Pf4 integration into LESB58 and PA14 genome

|                                                                                                                                                                                                                                                                                                                                                                                                                                                                                                                                                                                                                                                                                                                                                                                                                                                                                                                                                                                                                                               |
|-----------------------------------------------------------------------------------------------------------------------------------------------------------------------------------------------------------------------------------------------------------------------------------------------------------------------------------------------------------------------------------------------------------------------------------------------------------------------------------------------------------------------------------------------------------------------------------------------------------------------------------------------------------------------------------------------------------------------------------------------------------------------------------------------------------------------------------------------------------------------------------------------------------------------------------------------------------------------------------------------------------------------------------------------|
| <p>&gt;LESB58+Pf4</p> <p>CGGACGGTGTTCTGCCTATGTGGTTGAGTCATATGCTGAGCGGAAGCAGCGCGATGAAGCAATTG<br/>CGCTGGTGAAGTTGCTTGCATTGGCTCCCGCCAGTACGCAGAAGGCAAGCATCGCTCTGTTGATGA<br/>TTTGAAAGCTCGCCTTTCCAGGAGGTTTCGCTCAGCCAGAATAAGGAGGTTAATGTCCCGGTCGTC<br/>ATTCGTTTTACTGATACCGCAGAGCAAAGCATCGAAGACCAAGTCCACCACTTGGCTCCATTCCAAG<br/>GTGAACAGGCTGCACTCCAGTCAGTACTGAGCCTTTTGGATGAGATTGAAGAGAAGATTTCACCTTGC<br/>ACCTAAAGGTTACCCAGTCAGCCAGCAGGCGAGTCTTCTGGGGGTGCTGAGCTATCGCGAGCTTAA<br/>TACCGGCCCCTATCGTGTTTTTTACGAATTCCACGAAGAGCAAGGCGAGGTGGCAGTGATCTTGGTT<br/>TTGCGACAGAAGCAGAGCGTTGAGCAGCAATTGATCCGCTACTGCTTGGTGGGGCCAATCGAGTGA<br/>TGGCTTTCTACTCCTGAGCATGTAGCGCTGAATGCGCCTCGACACTTCTTCGACACCTTTCTTCCCC<br/>CAAAAAGCAAAGCCCCCGAAACGCTAGGCATTTTCAAGGGCTTGGCAGGGTGATTGAGCGGGCG<br/>AAGGGAATCGAACCCTCGTCATGAGCTTGGGAAGCTCAGGTAATGCCATTATACGACGCCCCTCG<br/>GACGGCTTTTGCAGCCAGGGCGCCTTTTACCAGATGCGCGGCGGCAGGTGAAGCCCGGGGCGGGG<br/>GTTTTTGTGATTTCGCTGGGTTTTTCCGCCAGGGGGAGCGGGGCTCCCCGTGGCGGTGGCGGTTAG<br/>CTGGCGAGGGCGGCGAGGGGGACGCTGGCGCCCCGTTGGGCTGGGGGCGTATG</p> |
| <p>&gt;PA14+Pf4</p> <p>GGGTCTGCCTATGTGGTTGAGTCATATGCTGAGCGGAAGCAGCGCGATGAAGCAATTGCGCTGGTG<br/>AAGTTGCTTGCATTGGCTCCCGCCAGTACGCAGAAGGCAAGCATCGCTCTGTTGATGATTTGAAAG<br/>CTCGCCTTTCCAGGAGGTTTCGCTCAGCCAGAATAAGGAGGTTAATGTCCCGGTCGTCATTCTGTTT<br/>TACTGATACCGCAGAGCAAAGCATCGAAGACCAAGTCCACCACTTGGCTCCATTCCAAGGTGAACA<br/>GGCTGCACTCCAGTCAGTACTGAGCCTTTTGGATGAGATTGAAGAGAAGATTTCACCTTGCACCTAAA<br/>GGTTACCCAGTCAGCCAGCAGGCGAGTCTTCTGGGGGTGCTGAGCTATCGCGAGCTTAATACCGGC<br/>CCCTATCGTGTTTTTTACGAATTCCACGAAGAGCAAGGCGAGGTGGCAGTGATCTTGGTTTTTGCAGC<br/>AGAAGCAGAGCGTTGAGCAGCAATTGATCCGCTACTGCTTGGTGGGGCCAATCGAGTGATGGCTTT<br/>CTACTCCTGAGCATGTAGCGCTGAATGCGCCTCGACACTTCTTCGACACCTTTCTTCCCCCAAAAA<br/>GCAAAGCCCCCGAAACGCTAGGCATTTTCAAGGGGCTTGGCAGGGTGATTGAGCGGGCGAAGGGA<br/>ATCGAACCCTCGTCATGAGCTTGGGAAGCTCAGGTAATGCCATTATACGACGCCCCTCGGACGGC<br/>TTTTGCGGCCAGGGCGCCTTTTACCAGATGCGCGGCGGCAGGTGAAGCCCGGGGCGGGGTTTTTGT<br/>TGATTTTCGCTGGGTTTTTCCGCCAGGGGGAGCGGGGCTCCCCGTGGCGGTGGCGGTTAGCTGGCGA<br/>GGGCGGCGAGGGGACGCTGGCGCCCGTTGGG</p>                     |

|     |          |                  |
|-----|----------|------------------|
| Pf4 | tRNA-Gly | Bacterial genome |
|-----|----------|------------------|
